# Supplementary material for: The Potential Use of Fungal Co-Culture Strategy for Discovery of New Secondary Metabolites
Source: MDPI journal article supplement (doi:10.3390/microorganisms11020464), 2023-02-12
Supplement: s1 [file s1]

# The Potential Use of Fungal Co-Culture Strategy for Discovery of New Secondary Metabolites

Shuang Xu, Mengshi Li, Zhe Hu, Yilan Shao, Jialiang Ying and Huawei Zhang \*

School of Pharmaceutical Sciences, Zhejiang University of Technology, Hangzhou 310014, China;

\* Correspondence: hwzhang@zjut.edu.cn

## Contents

|                                                                      |    |
|----------------------------------------------------------------------|----|
| <b>TableS1</b> Fungal—fungal co-culture derived new SMs (1—109)      | S2 |
| <b>TableS2</b> Fungal—bacterial co-culture derived new SMs (110—151) | S6 |
| <b>TableS3</b> Fungal—host co-culture derived new SMs (152—158)      | S8 |
| <b>References</b>                                                    | S9 |

Table S1 Fungal–fungal co-culture derived new SMs (1–109).

| Number | Co-culture Strains                                               | Source                                                                                                                                                                                      | Co-culture Medium | Biological Activity                                                                                                               | Reference |
|--------|------------------------------------------------------------------|---------------------------------------------------------------------------------------------------------------------------------------------------------------------------------------------|-------------------|-----------------------------------------------------------------------------------------------------------------------------------|-----------|
| 1      | <i>N. oryzae</i> and <i>B. bassiana</i> .                        | Seeds of <i>Dendrobium officinale</i> collected from Wenshan, Yunnan Province, China                                                                                                        | PDB               | Compounds <b>1</b> and <b>2</b> showed significant nitric oxide (No) inhibitory activity.                                         | [1]       |
| 2      |                                                                  |                                                                                                                                                                                             |                   |                                                                                                                                   |           |
| 3      |                                                                  |                                                                                                                                                                                             |                   |                                                                                                                                   |           |
| 4      |                                                                  |                                                                                                                                                                                             |                   |                                                                                                                                   |           |
| 5      |                                                                  |                                                                                                                                                                                             |                   |                                                                                                                                   |           |
| 6      | <i>Armillaria</i> sp. MK079569 and <i>Epicoccum</i> sp. YUD17002 | Rhizomes of the underground portion of <i>Gastrodia elata</i> collected from a plantation field at Xiaocaoba, Zhaotong, Yunnan Province, China                                              | PDB               | Compound <b>13</b> showed moderate <i>in vitro</i> cytotoxic activities and weak acetylcholinesterase (AChE) inhibitory activity. | [2]       |
| 7      |                                                                  |                                                                                                                                                                                             |                   |                                                                                                                                   |           |
| 8      |                                                                  |                                                                                                                                                                                             |                   |                                                                                                                                   |           |
| 9      |                                                                  |                                                                                                                                                                                             |                   |                                                                                                                                   |           |
| 10     |                                                                  |                                                                                                                                                                                             |                   |                                                                                                                                   |           |
| 11     | <i>N. oryzae</i> and <i>I. lacteus</i>                           | Seeds of <i>Dendrobium officinale</i> collected from Wenshan of Yunnan Province, China                                                                                                      | PDB               | Compound <b>18</b> showed anti-AChE activity.                                                                                     | [3]       |
| 12     |                                                                  |                                                                                                                                                                                             |                   |                                                                                                                                   |           |
| 13     |                                                                  |                                                                                                                                                                                             |                   |                                                                                                                                   |           |
| 14     |                                                                  |                                                                                                                                                                                             |                   |                                                                                                                                   |           |
| 15     |                                                                  |                                                                                                                                                                                             |                   |                                                                                                                                   |           |
| 16     | <i>Pleosporales</i> sp. F46 and <i>A. pilosum</i> F47            | Pedicel of the medicinal plant <i>M. fortunei</i> , which was collected from Qingdao, China                                                                                                 | PDB               |                                                                                                                                   | [4]       |
| 17     |                                                                  |                                                                                                                                                                                             |                   |                                                                                                                                   |           |
| 18     |                                                                  |                                                                                                                                                                                             |                   |                                                                                                                                   |           |
| 19     |                                                                  |                                                                                                                                                                                             |                   |                                                                                                                                   |           |
| 20     |                                                                  |                                                                                                                                                                                             |                   |                                                                                                                                   |           |
| 21     | <i>Phoma</i> sp. YUD17001 and <i>Armillaria</i> sp.              | Rhizomes of <i>Gastrodia elata</i> collected from a plantation field at Xiaocaoba, Zhaotong, Yunnan Province, China                                                                         | PDB               | -                                                                                                                                 | [5]       |
| 22     |                                                                  |                                                                                                                                                                                             |                   |                                                                                                                                   |           |
| 23     |                                                                  |                                                                                                                                                                                             |                   |                                                                                                                                   |           |
| 24     |                                                                  |                                                                                                                                                                                             |                   |                                                                                                                                   |           |
| 25     |                                                                  |                                                                                                                                                                                             |                   |                                                                                                                                   |           |
| 26     | <i>Armillaria</i> sp. and <i>Phoma</i> sp. YUD17001              |                                                                                                                                                                                             |                   | -                                                                                                                                 | [6]       |
| 27     |                                                                  |                                                                                                                                                                                             |                   |                                                                                                                                   |           |
| 28     |                                                                  |                                                                                                                                                                                             |                   |                                                                                                                                   |           |
| 29     |                                                                  |                                                                                                                                                                                             |                   |                                                                                                                                   |           |
| 30     |                                                                  |                                                                                                                                                                                             |                   |                                                                                                                                   |           |
| 31     | <i>P. fuscum</i> and <i>P. camembertii/clavigerum</i>            | A single sample of surface water from Berkeley Pit Lake                                                                                                                                     | PDB               | Compound <b>33</b> exhibited antimicrobial activity                                                                               | [7]       |
| 32     |                                                                  |                                                                                                                                                                                             |                   |                                                                                                                                   |           |
| 33     |                                                                  |                                                                                                                                                                                             |                   |                                                                                                                                   |           |
| 34     |                                                                  |                                                                                                                                                                                             |                   |                                                                                                                                   |           |
| 35     |                                                                  |                                                                                                                                                                                             |                   |                                                                                                                                   |           |
| 36     | <i>T. harzianum</i> M10 and <i>T. pinophilus</i> F36CF           | <i>T. harzianum</i> strain M10 was isolated from composted hard wood bark<br><i>T. pinophilus</i> F36CF was from a secondary branch of a strawberry tree collected in the isle of Favignana | PDB               | Cytotoxic activity                                                                                                                | [8]       |
| 37     |                                                                  |                                                                                                                                                                                             |                   |                                                                                                                                   |           |
| 38     |                                                                  |                                                                                                                                                                                             |                   |                                                                                                                                   |           |
| 39     |                                                                  |                                                                                                                                                                                             |                   |                                                                                                                                   |           |
| 40     |                                                                  |                                                                                                                                                                                             |                   |                                                                                                                                   |           |
| 41     | <i>A. nidulans</i> and <i>E. dendrobii</i>                       | -                                                                                                                                                                                           | PDB               | -                                                                                                                                 | [9]       |
| 42     |                                                                  |                                                                                                                                                                                             |                   |                                                                                                                                   |           |
| 43     |                                                                  |                                                                                                                                                                                             |                   |                                                                                                                                   |           |
| 44     |                                                                  |                                                                                                                                                                                             |                   |                                                                                                                                   |           |
| 45     |                                                                  |                                                                                                                                                                                             |                   |                                                                                                                                   |           |
| 46     |                                                                  |                                                                                                                                                                                             |                   |                                                                                                                                   |           |

|    |                                                                       |                                                                                                                                                     |                                                                                                                                                                                                                                         |                                                     |      |
|----|-----------------------------------------------------------------------|-----------------------------------------------------------------------------------------------------------------------------------------------------|-----------------------------------------------------------------------------------------------------------------------------------------------------------------------------------------------------------------------------------------|-----------------------------------------------------|------|
| 47 |                                                                       |                                                                                                                                                     |                                                                                                                                                                                                                                         |                                                     |      |
| 48 |                                                                       |                                                                                                                                                     |                                                                                                                                                                                                                                         |                                                     |      |
| 49 |                                                                       |                                                                                                                                                     |                                                                                                                                                                                                                                         |                                                     |      |
| 50 | <i>P. lilacinum</i> and <i>B. cinerea</i>                             | <i>B. cinerea</i> was isolated from a sick cucumber leaves. <i>P. lilacinum</i> was isolated from tomato roots                                      | PDB                                                                                                                                                                                                                                     | -                                                   | [10] |
| 51 | <i>P. orientoasiaticus</i> KMRB19040316                               | Korea Mushroom Resource Bank at                                                                                                                     | PDB                                                                                                                                                                                                                                     | Compound <b>5</b> displayed antibacterial effect on | [11] |
| 52 | and <i>X. flaviporus</i> KMRB19080638                                 | Seoul National University                                                                                                                           |                                                                                                                                                                                                                                         | <i>S. aureus</i> .                                  |      |
| 53 |                                                                       |                                                                                                                                                     |                                                                                                                                                                                                                                         |                                                     |      |
| 54 | <i>Nigrospora</i> sp. and <i>Stagonosporopsis</i> sp.                 | <i>Nicotiana tabacum</i> L. (No. Y20210917) in Yuxi of Yunnan Province, China                                                                       | PDB                                                                                                                                                                                                                                     | Antifungal activities                               | [12] |
| 55 | <i>P. ostreatus</i> SY10 and <i>P. eryngii</i> SY302                  | Shandong Province Key Lab of Applied Mycology in China                                                                                              | Liquid medium (glucose 10 g/L, KH <sub>2</sub> PO <sub>4</sub> 1 g/L, MgSO <sub>4</sub> 0.5 g/L, peptone 2 g/L, 1L sterilized wate)                                                                                                     |                                                     | [13] |
| 56 |                                                                       |                                                                                                                                                     |                                                                                                                                                                                                                                         |                                                     |      |
| 57 | <i>C. sambuci</i> FT1061 and <i>E. sorghinum</i> FT1062               | A healthy fruit of the plant <i>Rhodomyrtus tomentosa</i> collected on the Big Island in Hawaii                                                     | Liquid medium (mannitol 20 g/L, sucrose 10 g/L, monosodium glutamate 5 g/L, KH <sub>2</sub> PO <sub>4</sub> 0.5 g/L, MgSO <sub>4</sub> ·7 H <sub>2</sub> O 0.3 g/L, yeast extract 3 g/L, corn steep liquor 2 mL/L, 1 L distilled water) | -                                                   | [14] |
| 58 | <i>P. pinophilum</i> FKI-5653 and <i>T. harzianum</i> FKI-5655        | Soil collected in Hachijo Island, Tokyo, Japan                                                                                                      | Glucose–peptone broth                                                                                                                                                                                                                   | -                                                   | [15] |
| 59 | two <i>Aspergillus alliaceus</i> strain                               | A marine alga                                                                                                                                       | Malt liquid media (malt extract 10 g/L, yeast extract 4 g/L, glucose 4 g/L)                                                                                                                                                             | Cytotoxic activity                                  | [16] |
| 60 | <i>Chaunopycnis</i> sp. CMB-MF028 and <i>T. hamatum</i> CMB-MF030     | Inner tissue of a marine pulmonate false limpet <i>Siphonaria</i> sp. collected at the rocky intertidal zone of Moora Park, Shorncliffe, Queensland | ISP2 broth                                                                                                                                                                                                                              | -                                                   | [17] |
| 61 |                                                                       |                                                                                                                                                     |                                                                                                                                                                                                                                         |                                                     |      |
| 62 | <i>A. sclerotiorum</i> SCSGAF 0052 and <i>P. citrinum</i> SCSGAF 0053 | Gorgonian <i>Muricella flexuosa</i> collected from the South China Sea, Sanya, Hainan Province, China                                               | Liquid medium (glucose 10 g/L, soluble starch 10 g/L, MgSO <sub>4</sub> 1 g/L, KH <sub>2</sub> PO <sub>4</sub> 1 g/L, peptone 1 g/L, sea salt 30 g/L)                                                                                   | Compound <b>65</b> showed cytotoxic activity.       | [18] |
| 63 |                                                                       |                                                                                                                                                     |                                                                                                                                                                                                                                         |                                                     |      |
| 64 |                                                                       |                                                                                                                                                     |                                                                                                                                                                                                                                         |                                                     |      |
| 65 |                                                                       |                                                                                                                                                     |                                                                                                                                                                                                                                         |                                                     |      |
| 66 |                                                                       |                                                                                                                                                     |                                                                                                                                                                                                                                         |                                                     |      |
| 67 | <i>T. versicolor</i> and <i>G. applanatum</i>                         | Shandong Province Key Lab of Applied Mycology, China                                                                                                | Liquid medium (glucose 10 g/L, KH <sub>2</sub> PO <sub>4</sub> 1 g/L, MgSO <sub>4</sub> 0.5 g/L, and peptone 2 g/L 1L sterilized water)                                                                                                 | -                                                   | [19] |
| 68 |                                                                       |                                                                                                                                                     |                                                                                                                                                                                                                                         |                                                     |      |
| 69 | <i>Aspergillus</i> sp. FSY-01 and FSW-02                              | A rotten fruit of mangrove <i>Avicennia marina</i> in Zhanjiang, Guangdong Province, China                                                          | Medium GYP (glucose 10 g/L, yeast extract 1 g/L, peptone 2 g/L, crude sea salt 3.5 g/L)                                                                                                                                                 | -                                                   | [20] |
| 70 |                                                                       |                                                                                                                                                     |                                                                                                                                                                                                                                         |                                                     |      |
| 71 | strains Nos. 1924 and 3893                                            | An estuarine mangrove in Hong Kong, China                                                                                                           | Liquid medium (glucose 10 g/L, peptone 2 g/L, yeast extracts 1 g/L, crude marine salt 3.5 g/L, running water 1 L)                                                                                                                       | Antibacterial activities                            | [21] |
| 72 | <i>Phomopsis</i> sp. K38 and <i>Alternaria</i> sp.                    | South China sea coast                                                                                                                               | Liquid medium (glucose 10 g/L,                                                                                                                                                                                                          | Compound <b>72</b> had weak                         | [22] |

|                                  |                                                             |                                                                                                                                                                                                                                                                                                                        |                                                                                                                 |                                                                                                              |      |
|----------------------------------|-------------------------------------------------------------|------------------------------------------------------------------------------------------------------------------------------------------------------------------------------------------------------------------------------------------------------------------------------------------------------------------------|-----------------------------------------------------------------------------------------------------------------|--------------------------------------------------------------------------------------------------------------|------|
|                                  |                                                             | E33.                                                                                                                                                                                                                                                                                                                   | peptone 2 g/L, yeast extract 1 g/L, NaCl 30 g/L)                                                                | cytotoxic activity against Hep-2 and HepG2 cells.                                                            |      |
| 73                               | <i>Phomopsis</i> sp. K38 and <i>Alternaria</i> sp. E33.     |                                                                                                                                                                                                                                                                                                                        | Liquid medium (glucose 10 g/L, peptone 2 g/L, yeast extract 1 g/L, NaCl 30 g/L)                                 | Antimicrobial activity                                                                                       | [23] |
| 74<br>75                         | <i>Phomopsis</i> sp. K38 and <i>Alternaria</i> sp. E33.     |                                                                                                                                                                                                                                                                                                                        | liquid medium (glucose 10 g/L, Peptone 2 g/L, yeast extract 1 g/L, NaCl 30 g/L).                                | Antifungal activities                                                                                        | [24] |
| 76                               | <i>N. oryzae</i> and <i>B. bassiana</i>                     | Seeds of <i>Dendrobium officinale</i> from Wenshan, Yunnan Province, China                                                                                                                                                                                                                                             | Rice medium                                                                                                     | Antifungal activity against <i>B. bassiana</i> and <i>N.oryzae</i>                                           | [25] |
| 77<br>78<br>79<br>80<br>81<br>82 | <i>Pestalotiopsis</i> sp. and <i>P. bialowiezense</i>       | <i>Pestalotiopsis</i> sp. was isolated from the leaves of tea tree, collected from the Enshi Autonomous Prefecture of Hubei Province, China.<br><i>P. bialowiezense</i> was isolated from the fresh soft coral <i>Sarcophyton subviride</i> , collected from the Xisha Island in South China Sea                       | Rice medium                                                                                                     | Compound 77 showed significant $\beta$ -glucuronidase inhibitory potency.                                    | [26] |
| 83<br>84                         | <i>A. sydowii</i> EN-534 and <i>P. citrinum</i> EN-535      | Fresh tissue of the marine red alga <i>Laurencia okamurai</i> collected from Qingdao, China                                                                                                                                                                                                                            | Rice medium                                                                                                     | -                                                                                                            | [27] |
| 85<br>86                         | <i>P. bilaiae</i> MA-267 and <i>P. chermesinum</i> EN-480.  | <i>P. bilaiae</i> MA-267 was isolated from the rhizosphere of the marine mangrove plant <i>Lumnitzera racemosa</i> that was collected at Hainan Island.<br><i>P. chermesinum</i> EN-480 was isolated from the fresh tissue of marine red algal <i>Pterocladiaella tenuis</i> , collected from Shandong province, China | Rice medium                                                                                                     | Potent inhibitory activities against <i>Ceratobasidium cornigerum</i> and <i>Edwardsiella tarda</i> .        | [28] |
| 87                               | <i>A. terreus</i> EN-539 and <i>P. lilacinus</i> EN-531     | Inner tissues of the marine red alga <i>Laurencia okamurai</i>                                                                                                                                                                                                                                                         | Rice medium                                                                                                     | Inhibitory activity against <i>A. brassicae</i> , <i>E. coli</i> , <i>P. piricola</i> , and <i>S. aureus</i> | [29] |
| 88<br>89<br>90<br>91<br>92       | <i>A. sulphureus</i> KMM 4640 and <i>I. felina</i> KMM 4639 | <i>I. felina</i> was isolated from marine sediments collected at a depth of 10 m, The South China Sea, coast of Vietnam.<br><i>A. sulphureus</i> KMM 4640 was isolated from marine sediments                                                                                                                           | 20 g of rice, 20 mg of yeast extract, 10 mg of KH <sub>2</sub> PO <sub>4</sub> , and 40 mL of natural sea water | Compound 89 has cytotoxic activity.                                                                          | [30] |
| 93<br>94<br>95                   | <i>A. carneus</i> KMM 4638 and <i>I. felina</i> KMM 4639    | <i>A. carneus</i> was isolated from superficial mycobiota of the brown alga <i>Laminaria sachalinensis</i> collected on Kunashir Island<br><i>I. felina</i> was isolated from marine sediments collected at a depth of 10 m, Van Phong Bay, the South China Sea,                                                       | 20 g of rice, 20 mg of yeast extract, 10 mg of KH <sub>2</sub> PO <sub>4</sub> , and 40 mL of natural sea water | -                                                                                                            | [31] |

| Vietnam                                              |                                                                       |                                                                                                                                                                                                                                                                  |                                                                                                                                                                                                                                                              |                                                                   |      |
|------------------------------------------------------|-----------------------------------------------------------------------|------------------------------------------------------------------------------------------------------------------------------------------------------------------------------------------------------------------------------------------------------------------|--------------------------------------------------------------------------------------------------------------------------------------------------------------------------------------------------------------------------------------------------------------|-------------------------------------------------------------------|------|
| <b>96</b><br><b>97</b>                               | <i>P. fluorescens</i> and <i>P. nobilis</i>                           | Sediment samples obtained from the Windebyer Noor, Schleswig-Holstein                                                                                                                                                                                            | PDA                                                                                                                                                                                                                                                          | -                                                                 | [32] |
| <b>98</b>                                            | <i>T. rubrum</i> Sin146 and <i>B. ochroleuca</i> Sin80                | <i>T. rubrum</i> Sin146 was isolated from onychomycosis collected at the Centre Hospitalier Cantonal Vaudois.<br><i>B. ochroleuca</i> Sin80 was collected as a soil isolate                                                                                      | PDA                                                                                                                                                                                                                                                          | -                                                                 | [33] |
| <b>99</b><br><b>100</b>                              | <i>Cosmospora</i> sp. and <i>M. oryzae</i>                            | <i>Cosmospora</i> sp. was isolated from the Baltic Sea environment.<br><i>M. oryzae</i> was obtained from Deutsche Sammlung für Mikroorganismen und Zellkulturen                                                                                                 | PDA                                                                                                                                                                                                                                                          | -                                                                 | [34] |
| <b>101</b>                                           | <i>A. fischeri</i> NRRL 181 and <i>T. labelliformis</i> G536          | <i>A. fischeri</i> NRRL 181 was acquired from the ARS Culture Collection. <i>T. labelliformis</i> G536 was isolated from surface sterilized twigs of paw paw ( <i>A. triloba</i> (L.) Dunal, Annonaceae) collected from Pfafftown, NC, USA                       | Quaker Breakfast Oatmeal (10 g of oatmeal with 17 mL of deionized water)                                                                                                                                                                                     | -                                                                 | [35] |
| <b>102</b><br><b>103</b><br><b>104</b><br><b>105</b> | <i>P. crustosum</i> PRB-2 and <i>Xylaria</i> sp. HDN13-249            | <i>P. crustosum</i> PRB-2 was isolated from deep-sea sludge collected at a depth of 526 m in Prydz Bay<br><i>Xylaria</i> sp. HDN13-249 was isolated from the root of <i>Sonneratia caseolaris</i> collected from the mangrove conservation area of Hainan, China | Solid medium (soluble starch 40 g/L, yeast extract 1 g/L, MgSO <sub>4</sub> 0.3 g/L, monosodium glutamate 2 g/L, sucrose 40 g/L, KH <sub>2</sub> PO <sub>4</sub> 0.5 g/L, maltose 30 g/L, bean flour 0.5g/L, peptone 2 g/L, agar power 25 g/L, 1 L seawater) | Compound <b>103</b> possessed potential antituberculosis effects. | [36] |
| <b>106</b><br><b>107</b>                             | <i>P. citrinum</i> MA-197 and <i>B. felina</i> EN-135.                | <i>P. citrinum</i> MA-197 was isolated from the mangrove plant <i>Lumnitzera racemose</i><br><i>B. felina</i> EN-135 was isolated from an unidentified marine bryozoan                                                                                           | Wheat bran broth medium (100 mL of naturally sourced and filtered seawater from the Huiquan gulf of the Yellow Sea near the campus of IOCAS, 100 g of wheat bran, and 0.6 g of dried potato powder)                                                          | Inhibitory activities against several human and aquatic pathogens | [37] |
| <b>108</b>                                           | <i>T. pinophilus</i> 17F4103 and <i>Paraphaeosphaeria</i> sp. 17F4110 | Soil collected in Miyazaki Prefecture, Japan                                                                                                                                                                                                                     | Malt agar medium (malt extract 20 g/L, peptone 5 g/L, and agar 15 g/L 1 L deionized water)                                                                                                                                                                   | -                                                                 | [38] |
| <b>109</b>                                           | <i>I. lacteus</i> 13S011 and <i>P. oryzae</i> 13S070.                 | Kumamoto Prefecture, Japan                                                                                                                                                                                                                                       | Malt agar medium (malt extract 20 g/L, peptone 5 g/L, and agar 15 g/L 1 L deionized water)                                                                                                                                                                   | -                                                                 | [39] |

**Table S2** Fungal–bacterial co-culture derived new SMs (110–151).

| Number                   | Co-culture Strains                                                                   | Source                                                                                                                                                                                                                                                                                                                    | Co-culture Medium                                                                                                                                                                                         | Biological Activity                                                                             | Reference |
|--------------------------|--------------------------------------------------------------------------------------|---------------------------------------------------------------------------------------------------------------------------------------------------------------------------------------------------------------------------------------------------------------------------------------------------------------------------|-----------------------------------------------------------------------------------------------------------------------------------------------------------------------------------------------------------|-------------------------------------------------------------------------------------------------|-----------|
| 110                      | <i>S. terrestris</i> DBE-9 and <i>B. amyloliquifaciens</i> BBS4                      | <i>S. terrestris</i> DBE-9 was isolated from the leaf sample of <i>D. binectariferum</i> collected from the region of Bangalore, India<br><i>B. amyloliquifaciens</i> BBS4 was isolated from the soil sample                                                                                                              | PDB                                                                                                                                                                                                       | Cytotoxic effect on PC-3 and MCF-7 cell lines                                                   | [40]      |
| 111<br>112<br>113<br>114 | <i>Trichoderma</i> sp. (Strain 307) and <i>A. johnsonii</i> (Strain B2)              | <i>Trichoderma</i> sp. (Strain 307) was isolated from the stem bark of <i>Clerodendrum inerme</i> , collected in Zhanjiang Mangrove National Nature Reserve in Guangdong Province, China<br><i>A. johnsonii</i> (Strain B2) was isolated from an aquaculture pond at the Maoming Experimental Station in Guangdong, China | ISP2 broth                                                                                                                                                                                                | Compounds <b>113</b> and <b>114</b> exhibited potent $\alpha$ -glucosidase inhibitory activity. | [41]      |
| 115<br>116<br>117<br>118 | <i>Libertella</i> sp. CNL-523 and <i><math>\alpha</math>-proteobacterium</i> CNJ-328 | <i>Libertella</i> sp. CNL-523 was isolated from an ascidian collected in the Bahamas<br><i><math>\alpha</math>-proteobacterium</i> CNJ-328 was isolated from a fungal culture                                                                                                                                             | YPM medium (mannitol 4 g/L, yeast extract 2 g/L, peptone 2 g/L, 1 L seawater)                                                                                                                             | Cytotoxicity against the HCT-116 human adenocarcinoma cell line                                 | [42]      |
| 119<br>120               | <i>A. fumigatus</i> and <i>S. peucetius</i>                                          | <i>A. fumigatus</i> was acquired from the Michigan Department of Health.<br><i>S. peucetius</i> was purchased from the American Type Culture Collection.                                                                                                                                                                  | ISP2 broth                                                                                                                                                                                                | -                                                                                               | [43]      |
| 121                      | <i>S. bullii</i> and <i>A. fumigatus</i> MBC-F1-10                                   | <i>S. bullii</i> was isolated from the soil taken from the Laguna de Chaxa of the Salar de Atacama<br><i>A. fumigatus</i> MBC-F1-10 was isolated from the <i>S. bullii</i> culture                                                                                                                                        | ISP2 broth                                                                                                                                                                                                | -                                                                                               | [44]      |
| 122<br>123               | <i>A. fumigatus</i> KMC-901 and <i>Sphingomonas</i> sp. KMK-001                      | An extremely contaminated acid mine drainage collected from a horizontal pit, situated at an elevation of 750 m at the Young-dong abandoned coal mine located at Gangneung, South Korea                                                                                                                                   | Czapek-Dox broth ( saccharose 30 g/L, sodium nitrate 3 g/L, dipotassium phosphate 1 g/L, magnesium sulfate 0.5 g/L, potassium chloride 0.5 g/L, ferrous sulfate 0.01 g/L, 1 L distilled H <sub>2</sub> O) | -                                                                                               | [45,46]   |
| 124<br>125               | <i>P. agglomerans</i> and <i>P. citrinum</i>                                         | Laboratory of Soil Biology, University of Neuchatel, Switzerland                                                                                                                                                                                                                                                          | ISP2 broth                                                                                                                                                                                                | -                                                                                               | [47]      |
| 126<br>127<br>128        | <i>F. pallidroseum</i> ATCC 74289 and <i>S. erythraea</i> ATCC 31772                 | American Type Culture Collection (ATCC)                                                                                                                                                                                                                                                                                   | ISP2 broth                                                                                                                                                                                                | -                                                                                               | [48]      |

|                                 |                                                                                           |                                                                                                                                                                                                                                                    |                                                                                                                                            |                                                                                                               |      |
|---------------------------------|-------------------------------------------------------------------------------------------|----------------------------------------------------------------------------------------------------------------------------------------------------------------------------------------------------------------------------------------------------|--------------------------------------------------------------------------------------------------------------------------------------------|---------------------------------------------------------------------------------------------------------------|------|
| 129<br>130                      | <i>Emericella</i> sp. CNL-878 and <i>S. Arenicola</i> CNH-665                             | <i>Emericella</i> sp. CNL-878 was isolated from the surface of a green alga of the genus <i>Halimeda</i> , collected at Madang Bay in Papua New Guinea. <i>S. Arenicola</i> CNH-665 was isolated from a sediment sample collected from the Bahamas | YPM medium (mannitol 4 g/L, yeast extract 2g/L, peptone 2 g/L, 1 L seawater)                                                               | Antibacterial activities                                                                                      | [49] |
| 131                             | <i>Cladosporium</i> sp. WUH1 and <i>B. subtilis</i> CMCC (B) 63501                        | <i>B. subtilis</i> CMCC(B) 63501 was purchased from National Center for Medical Culture Collections. <i>Cladosporium</i> sp. WUH1 was isolated from hydrothermal vent sediment, collected from Kueishantao, Taiwan, China                          | PDA-LB liquid culture medium (potato lixivium 100 g/L, dextrose 10 g/L, yeast extract 5 g/L, peptone 10 g/L, NaCl 10 g/L)                  | Antibacterial activity                                                                                        | [50] |
| 132<br>133<br>134<br>135<br>136 | <i>F. tricinctum</i> and <i>S. lividans</i> TK24                                          | <i>F. tricinctum</i> was obtained from healthyfresh rhizomes of <i>A. paucinervis</i> (Aristolochiaceae)                                                                                                                                           | Rice medium                                                                                                                                | -                                                                                                             | [51] |
| 137<br>138                      | <i>A. versicolor</i> KU258497 and <i>B. subtilis</i> 168 trpC2                            | <i>A. versicolor</i> KU258497 was isolated from fresh healthy leaves of <i>Eichhornia crassipes</i> , family Pontederiaceae, obtained from the shores of the River Nile in Mansoura, Egypt                                                         | Rice medium                                                                                                                                | Compound 138 showed moderate cytotoxic activity against the mouse lymphoma cell line L5178Y                   | [52] |
| 139<br>140<br>141<br>142        | <i>A. sydowii</i> and <i>B. subtilis</i>                                                  | <i>A. sydowii</i> was isolated from a piece of deep-sea mud from Dalian, China                                                                                                                                                                     | PDA                                                                                                                                        | -                                                                                                             | [53] |
| 143                             | <i>Pestalotia</i> sp. CNL-365, and an unidentified, antibiotic-resistant marine bacterium | <i>Pestalotia</i> sp.CNL-365 from a sample of the brown alga <i>Rosenvingea</i> sp. collected in the Bahamas Islands                                                                                                                               | YPG Medium(glucose 10 g/L, peptone 5 g/L, yeast extract 5 g/L, agar 15 g/L, penicillinG 0.1g/L streptomycin sulfate 0.1 g/L, 1 L seawater) | Antibiotic activity against methicillin-resistant <i>S. aureus</i> and vancomycin-resistant <i>E. faecium</i> | [54] |
| 144<br>145<br>146               | <i>F. tricinctum</i> and <i>B. subtilis</i> 168 trpC2.                                    | <i>F. tricinctum</i> was isolated from fresh, healthy rhizomes of <i>Aristolochia paucinervis</i> collected from the mountains of Beni-Mellal Morocco                                                                                              | Rice medium                                                                                                                                | -                                                                                                             | [55] |
| 147                             | <i>W. actinomycete</i> WAC 2288 and <i>C. neoformans</i>                                  | A Nigerian soil sample                                                                                                                                                                                                                             | Bennett’s agar                                                                                                                             | Antimicrobial activity                                                                                        | [56] |
| 148<br>149<br>150<br>151        | <i>A. sversicolor</i> and <i>B. subtilis</i> 168 trpC2                                    | <i>A. versicolor</i> was isolated from the sponge <i>Agelas oroides</i> , collected at a depth of 10 m in Aliğa-İzmir, Turkey                                                                                                                      | Rice medium                                                                                                                                | -                                                                                                             | [57] |

**Table S3** Fungal–host co-culture derived new SMs (152–158).

| Number | Co-culture Strain and Host                                                 | Source                                                                                                  | Co-culture Medium | Biological Activity | Reference |
|--------|----------------------------------------------------------------------------|---------------------------------------------------------------------------------------------------------|-------------------|---------------------|-----------|
| 152    | <i>N. oryzae</i> , <i>I. lacteus</i> , and host plant <i>D. officinale</i> | <i>D.officinale</i> and <i>D. devoninum</i> seeds from Wenshan in Yunnan Province, China                | PDB               | Antifungal activity | [58]      |
| 153    | <i>P. verruculosa</i> and the host plant <i>D. officinale</i>              | <i>P. verruculosa</i> from the rhizosphere of <i>D. officinale</i> in Wenshan of Yunnan Province, China | PDB               | -                   | [59]      |
| 154    |                                                                            |                                                                                                         |                   |                     |           |
| 155    |                                                                            |                                                                                                         |                   |                     |           |
| 156    |                                                                            |                                                                                                         |                   |                     |           |
| 157    |                                                                            |                                                                                                         |                   |                     |           |
| 158    |                                                                            |                                                                                                         |                   |                     |           |



## References

1. Zhang, Z.X.; Yang, X.Q.; Zhou, Q.Y.; Wang, B.Y.; Hu, M.; Yang, Y.B.; Zhou, H.; Ding, Z.T. New azaphilones from *Nigrospora oryzae* co-cultured with *Beauveria bassiana*. *Molecules* **2018**, *23*, doi:10.3390/molecules23071816.
2. Li, H.-T.; Tang, L.-H.; Liu, T.; Yang, R.-N.; Yang, Y.-B.; Zhou, H.; Ding, Z.-T. Protoilludane-type sesquiterpenoids from *Armillaria* sp. by co-culture with the endophytic fungus *Epicoccum* sp. associated with *Gastrodia elata*. *Bioorg. Chem.* **2020**, *95*, doi:10.1016/j.bioorg.2019.103503.
3. Zhou, Q.-Y.; Yang, X.-Q.; Zhang, Z.-X.; Wang, B.-Y.; Hu, M.; Yang, Y.-B.; Zhou, H.; Ding, Z.-T. New azaphilones and tremulane sesquiterpene from endophytic *Nigrospora oryzae* cocultured with *Irpex lacteus*. *Fitoterapia* **2018**, *130*, 26-30, doi:10.1016/j.fitote.2018.07.018.
4. Wang, Z.-R.; Yang, H.-X.; Peng, X.-P.; Li, G.; Lou, H.-X. Induced production of zinniol analogues by co-cultivation of two endophytic fungi in the same ecological niche. *Phytochem. Lett.* **2020**, *35*, 206-210, doi:10.1016/j.phytol.2019.12.007.
5. Li, H.T.; Zhou, H.; Duan, R.T.; Li, H.Y.; Tang, L.H.; Yang, X.Q.; Yang, Y.B.; Ding, Z.T. Inducing secondary metabolite production by co-culture of the endophytic fungus *Phoma* sp. and the symbiotic fungus *Armillaria* sp. *J. Nat. Prod.* **2019**, *82*, 1009-1013, doi:10.1021/acs.jnatprod.8b00685.
6. Li, H.-T.; Liu, T.; Yang, R.; Xie, F.; Yang, Z.; Yang, Y.; Zhou, H.; Ding, Z.-T. Phomretones A-F, C-12 polyketides from the co-cultivation of *Phoma* sp. YUD17001 and *Armillaria* sp. *RSC. Adv.* **2020**, *10*, 18384-18389, doi:10.1039/d0ra02524k.
7. Stierle, A.A.; Stierle, D.B.; Decato, D.; Priestley, N.D.; Alverson, J.B.; Hoody, J.; McGrath, K.; Klepacki, D. The berkeleylactones, antibiotic macrolides from fungal coculture. *J. Nat. Prod.* **2017**, *80*, 1150-1160, doi:10.1021/acs.jnatprod.7b00133.
8. Vinale, F.; Nicoletti, R.; Borrelli, F.; Mangoni, A.; Parisi, O.A.; Marra, R.; Lombardi, N.; Lacatena, F.; Grauso, L.; Finizio, S.; et al. Co-culture of plant beneficial microbes as source of bioactive metabolites. *Sci. Rep.* **2017**, *7*, 14330, doi:10.1038/s41598-017-14569-5.
9. Gang Wang, H.R.; Jie Fan, Nancy P. Keller, Zhiguo Liu, Fan Wu, Wen-Bing Yin. Fungal-fungal cocultivation leads to widespread secondary metabolite alteration requiring the partial loss-of-function VeA1 protein. *Sci. adv.* **2022**, *8*.
10. Liu, R.; Khan, R.A.A.; Yue, Q.; Jiao, Y.; Yang, Y.; Li, Y.; Xie, B. Discovery of a new antifungal lipopeptaibol from *Purpureocillium lilacinum* using MALDI-TOF-IMS. *Biochem. Bioph. Res. Co.* **2020**, *527*, 689-695, doi:10.1016/j.bbrc.2020.05.021.
11. Pham, H.T.; Doan, T.P.; Kim, H.W.; Kim, T.W.; Park, S.Y.; Kim, H.; Lee, M.; Kim, K.H.; Oh, W.K.; Lim, Y.W.; et al. Cyclohumulanoid sesquiterpenes induced by the noncompetitive coculture of *Phellinus orientoasiaticus* and *Xylodon flaviporus*. *J. Nat. Prod.* **2022**, *85*, 511-518, doi:10.1021/acs.jnatprod.1c01022.
12. Chen, J.X.; Xia, D.D.; Yang, X.Q.; Yang, Y.B.; Ding, Z.T. The antifeedant and antifungal cryptic metabolites isolated from tobacco endophytes induced by host medium and coculture. *Fitoterapia* **2022**, *163*, 105335, doi:10.1016/j.fitote.2022.105335.
13. Ge, X.; Wang, Y.; Sun, C.; Zhang, Z.; Song, L.; Tan, L.; Li, D.; Yang, S.; Yu, G. Secondary metabolites produced by coculture of *Pleurotus ostreatus* SY10 and *Pleurotus eryngii* SY302. *Chem. Biodivers.* **2022**, *19*, e202100832-n/a, doi:10.1002/cbdv.202100832.
14. Li, C.; Sarotti, A.M.; Yang, B.; Turkson, J.; Cao, S. A new N-methoxypyridone from the co-cultivation of hawaiian endophytic fungi *Camporesia sambuci* FT1061 and *Epicoccum sorghinum* FT1062. *Molecules* **2017**, *22*, doi:10.3390/molecules22071166.
15. Nonaka, K.; Abe, T.; Iwatsuki, M.; Mori, M.; Yamamoto, T.; Shiomi, K.; Omura, S.; Masuma, R. Enhancement of metabolites productivity of *Penicillium pinophilum* FKI-5653, by co-culture with *Trichoderma harzianum* FKI-5655. *J. Antibiot.* **2011**, *64*, 769-774, doi:10.1038/ja.2011.91.
16. Mandelare, P.E.; Adpressa, D.A.; Kaweesa, E.N.; Zakharov, L.N.; Loesgen, S. Coculture of two developmental stages of a marine-derived *Aspergillus alliaceus* results in the production of the cytotoxic bianthrone allianthrone A. *J. Nat. Prod.* **2018**, *81*, 1014-1022, doi:10.1021/acs.jnatprod.8b00024.
17. Shang, Z.; Salim, A.A.; Capon, R.J. Chaunopyran A: co-cultivation of marine mollusk-derived fungi activates a rare class of 2-alkenyl-tetrahydropyran. *J. Nat. Prod.* **2017**, *80*, 1167-1172, doi:10.1021/acs.jnatprod.7b00144.
18. Bao, J.; Wang, J.; Zhang, X.Y.; Nong, X.H.; Qi, S.H. New furanone derivatives and alkaloids from the co-culture of marine-derived fungi *Aspergillus sclerotiorum* and *Penicillium citrinum*. *Chem. Biodivers.* **2017**, *14*, doi:10.1002/cbdv.201600327.
19. Yao, L.; Zhu, L.P.; Xu, X.Y.; Tan, L.L.; Sadilek, M.; Fan, H.; Hu, B.; Shen, X.T.; Yang, J.; Qiao, B.; et al. Discovery of novel xylosides in co-culture of basidiomycetes *Trametes versicolor* and *Ganoderma applanatum* by integrated metabolomics and bioinformatics. *Sci. Rep.* **2016**, *6*, 33237, doi:10.1038/srep33237.
20. Zhu, F.; Li, J.-S.; Xie, W.-C.; Shi, J.-J.; Xu, F.; Song, Z.-F.; Liu, Y.-L. Structure revision of aspergicin by the crystal structure of aspergicine, a co-occurring isomer produced by co-culture of two mangrove epiphytic fungi. *Nat. Prod. Res.* **2017**, *31*, 2268-2272, doi:10.1080/14786419.2017.1300800.

21. Zhu, F.; Lin, Y.C. Marinamide, a novel alkaloid and its methyl ester produced by the application of mixed fermentation technique to two mangrove endophytic fungi from the South China Sea. *Chin. Sci. Bull.* **2006**, *51*, 1426-1430, doi:10.1007/s11434-006-1426-4.
22. Li, C.Y.; Ding, W.J.; Shao, C.L.; She, Z.G.; Lin, Y.C. A new diimide derivative from the co-culture broth of two mangrove fungi (strain no. E33 and K38). *J. Asian Nat. Prod. Res.* **2010**, *12*, 809-813, doi:10.1080/10286020.2010.497757.
23. Li, C.; Wang, J.; Luo, C.; Ding, W.; Cox, D.G. A new cyclopeptide with antifungal activity from the co-culture broth of two marine mangrove fungi. *Nat. Prod. Res.* **2014**, *28*, 616-621, doi:10.1080/14786419.2014.887074.
24. Huang, S.; Ding, W.; Li, C.; Cox, D.G. Two new cyclopeptides from the co-culture broth of two marine mangrove fungi and their antifungal activity. *Pharmacogn. Mag.* **2014**, *10*, 410-414, doi:10.4103/0973-1296.141781.
25. Zhang, Z.-X.; Yin, H.-Y.; Yang, Y.-B.; Wang, D.-L.; Zhao, T.-D.; Wang, C.-F.; Yang, X.-Q.; Ding, Z.-T. A new chlorinated tetralone from co-culture of insect-pathogenic *Beauveria bassiana* and phytopathogenic *Nigrospora oryzae*. *Chem. Nat. Compd.* **2021**, *57*, 297-299, doi:10.1007/s10600-021-03343-9.
26. Li, F.; Yan, S.; Huang, Z.; Gao, W.; Zhang, S.; Mo, S.; Lin, S.; Wang, J.; Hu, Z.; Zhang, Y. Inducing new bioactive metabolites production from coculture of *Pestalotiopsis* sp. and *Penicillium bialowiezense*. *Bioorg. Chem.* **2021**, *110*, 104826, doi:10.1016/j.bioorg.2021.104826.
27. Sui-Qun Yang, b., Xiao-Ming Lia, Xin Lia, Hong-Lei Lia, Ling-Hong Menga, Bin-Gui Wang. New citrinin analogues produced by coculture of the marine algal-derived endophytic fungal strains *Aspergillus sydowii* EN-534 and *Penicillium citrinum* EN-535. *Phytochem. Lett.* **2018**, *25*, 191-195, doi:10.1016/j.phytol.2018.04.023.
28. Meng, L.H.; Li, X.M.; Li, H.L.; Wang, B.G. Chermebilaenes A and B, new bioactive meroterpenoids from co-cultures of marine-derived isolates of *Penicillium bilaiae* MA-267 and *Penicillium chermesinum* EN-480. *Mar. Drugs* **2020**, *18*, doi:10.3390/md18070339.
29. Li, H.L.; Li, X.M.; Yang, S.Q.; Cao, J.; Li, Y.H.; Wang, B.G. Induced terreins production from marine red algal-derived endophytic fungus *Aspergillus terreus* EN-539 co-cultured with symbiotic fungus *Paecilomyces lilacinus* EN-531. *J. Antibiot.* **2020**, *73*, 108-111, doi:10.1038/s41429-019-0242-4.
30. Afyatullo, S.S.; Zhuravleva, O.I.; Antonov, A.S.; Berdyshev, D.V.; Pivkin, M.V.; Denisenko, V.A.; Popov, R.S.; Gerasimenko, A.V.; von Amsberg, G.; Dyshlovoy, S.A.; et al. Prenylated indole alkaloids from co-culture of marine-derived fungi *Aspergillus sulphureus* and *Isaria felina*. *J. Antibiot.* **2018**, *71*, 846-853, doi:10.1038/s41429-018-0072-9.
31. Zhuravleva, O.I.; Belousova, E.B.; Oleinikova, G.K.; Antonov, A.S.; Khudyakova, Y.V.; Rasin, A.B.; Popov, R.S.; Menchinskaya, E.S.; Trinh, P.T.H.; Yurchenko, A.N.; et al. Cytotoxic drimane-type sesquiterpenes from co-culture of the marine-derived fungi *Aspergillus carneus* KMM 4638 and *Beauveria felina* (= *Isaria felina*) KMM 4639. *Mar. Drugs* **2022**, *20*, doi:10.3390/md20090584.
32. Oppong-Danquah, E.; Budnicka, P.; Blumel, M.; Tasdemir, D. Design of fungal co-cultivation based on comparative metabolomics and bioactivity for discovery of marine fungal agrochemicals. *Mar. Drugs* **2020**, *18*, doi:10.3390/md18020073.
33. Bertrand, S.; Schumpp, O.; Bohni, N.; Monod, M.; Gindro, K.; Wolfender, J.L. De novo production of metabolites by fungal co-culture of *Trichophyton rubrum* and *Bionectria ochroleuca*. *J. Nat. Prod.* **2013**, *76*, 1157-1165, doi:10.1021/np400258f.
34. Oppong-Danquah, E.; Blumel, M.; Scarpato, S.; Mangoni, A.; Tasdemir, D. Induction of Isochromanones by Co-Cultivation of the Marine Fungus *Cosmospora* sp. and the Phytopathogen *Magnaporthe oryzae*. *Int J Mol Sci* **2022**, *23*, doi:10.3390/ijms23020782.
35. Knowles, S.L.; Raja, H.A.; Isawi, I.H.; Flores-Bocanegra, L.; Reggio, P.H.; Pearce, C.J.; Burdette, J.E.; Rokas, A.; Oberlies, N.H. Wheldone: Characterization of a unique scaffold from the coculture of *Aspergillus fischeri* and *Xylaria flabelliformis*. *Org. Lett.* **2020**, *22*, 1878-1882, doi:10.1021/acs.orglett.0c00219.
36. Yu, G.; Sun, Z.; Peng, J.; Zhu, M.; Che, Q.; Zhang, G.; Zhu, T.; Gu, Q.; Li, D. Secondary metabolites produced by combined culture of *Penicillium crustosum* and a *Xylaria* sp. *J. Nat. Prod.* **2019**, *82*, 2013-2017, doi:10.1021/acs.jnatprod.9b00345.
37. Meng, L.H.; Liu, Y.; Li, X.M.; Xu, G.M.; Ji, N.Y.; Wang, B.G. Citrifelins A and B, citrinin adducts with a tetracyclic framework from cocultures of marine-derived isolates of *Penicillium citrinum* and *Beauveria felina*. *J. Nat. Prod.* **2015**, *78*, 2301-2305, doi:10.1021/acs.jnatprod.5b00450.
38. Murakami, S.; Hayashi, N.; Inomata, T.; Kato, H.; Hitora, Y.; Tsukamoto, S. Induction of secondary metabolite production by fungal co-culture of *Talaromyces pinophilus* and *Paraphaeosphaeria* sp. *J. Nat. Med.* **2020**, *74*, 545-549, doi:10.1007/s11418-020-01400-1.
39. Sadahiro, Y.; Kato, H.; Williams, R.M.; Tsukamoto, S. Irpexine, an isoindolinone alkaloid produced by coculture of endophytic fungi, *Irpex lacteus* and *Phaeosphaeria oryzae*. *J. Nat. Prod.* **2020**, *83*, 1368-1373, doi:10.1021/acs.jnatprod.0c00047.
40. Arora, D.; Chashoo, G.; Singamaneni, V.; Sharma, N.; Gupta, P.; Jaglan, S. *Bacillus amyloliquefaciens* induces production of a novel blennolide K in coculture of *Setophoma terrestris*. *J. Appl. Microbiol.* **2018**, *124*, 730-739, doi:10.1111/jam.13683.

41. Zhang, L.; Niaz, S.I.; Khan, D.; Wang, Z.; Zhu, Y.; Zhou, H.; Lin, Y.; Li, J.; Liu, L. Induction of diverse bioactive secondary metabolites from the mangrove endophytic fungus *Trichoderma* sp. (Strain 307) by co-cultivation with *Acinetobacter johnsonii* (Strain B2). *Mar. Drugs* **2017**, *15*, doi:10.3390/md15020035.
42. Oh, D.C.; Jensen, P.R.; Kauffman, C.A.; Fenical, W. Libertellenones A-D: induction of cytotoxic diterpenoid biosynthesis by marine microbial competition. *Bioorg. Med. Chem.* **2005**, *13*, 5267-5273, doi:10.1016/j.bmc.2005.05.068.
43. Zuck, K.M.; Shipley, S.; Newman, D.J. Induced production of N-formyl alkaloids from *Aspergillus fumigatus* by co-culture with *Streptomyces peucetius*. *J. Nat. Prod.* **2011**, *74*, 1653-1657, doi:10.1021/np200255f.
44. Rateb, M.E.; Hallyburton, I.; Houssen, W.E.; Bull, A.T.; Goodfellow, M.; Santhanam, R.; Jaspars, M.; Ebel, R. Induction of diverse secondary metabolites in *Aspergillus fumigatus* by microbial co-culture. *RSC Adv.* **2013**, *3*, doi:10.1039/c3ra42378f.
45. Hyun Bong Park, H.C.K., Chang-Ho Lee, and Hyun Ok Yang. Glionitrin A, an antibioic-antitumor metabolite derived from competitive interaction between abandoned mine microbes. *J. Nat. Prod.* **2009**, *72*, 248–252.
46. Park, H.B.; Kim, Y.J.; Park, J.S.; Yang, H.O.; Lee, K.R.; Kwon, H.C. Glionitrin B, a cancer invasion inhibitory diketopiperazine produced by microbial coculture. *J. Nat. Prod.* **2011**, *74*, 2309-2312, doi:10.1021/np200563x.
47. Thissera, B.; Alhadrami, H.A.; Hassan, M.H.A.; Hassan, H.M.; Bawazeer, M.; Yaseen, M.; Belbahri, L.; Rateb, M.E.; Behery, F.A. Induction of cryptic antifungal pulicatin derivatives from pantoea agglomerans by microbial co-culture. *Biomolecules* **2020**, *10*, doi:10.3390/biom10020268.
48. Whitt, J.; Shipley, S.M.; Newman, D.J.; Zuck, K.M. Tetramic acid analogues produced by coculture of *Saccharopolyspora erythraea* with *Fusarium pallidroseum*. *J. Nat. Prod.* **2014**, *77*, 173-177, doi:10.1021/np400761g.
49. Dong-Chan Oh, C.A.K., Paul R. Jensen, and William Fenical. Induced production of emericellamides A and B from the marine derived fungus *Emericella* sp. in competing coculture. *J. Nat. Prod.* **2007**, *70*, 515-520.
50. Shi, Y.; Pan, C.; Wang, K.; Chen, X.; Wu, X.; Chen, C.A.; Wu, B. Synthetic multispecies microbial communities reveals shifts in secondary metabolism and facilitates cryptic natural product discovery. *Environ. Microbiol.* **2017**, *19*, 3606-3618, doi:10.1111/1462-2920.13858.
51. Moussa, M.; Ebrahim, W.; Bonus, M.; Gohlke, H.; Mandi, A.; Kurtan, T.; Hartmann, R.; Kalscheuer, R.; Lin, W.; Liu, Z.; et al. Co-culture of the fungus *Fusarium tricinctum* with *Streptomyces lividans* induces production of cryptic naphthoquinone dimers. *RSC. Adv.* **2019**, *9*, 1491-1500, doi:10.1039/c8ra09067j.
52. Abdelwahab, M.F.; Kurtán, T.; Mándi, A.; Müller, W.E.G.; Fouad, M.A.; Kamel, M.S.; Liu, Z.; Ebrahim, W.; Daletos, G.; Proksch, P. Induced secondary metabolites from the endophytic fungus *Aspergillus versicolor* through bacterial co-culture and OSMAC approaches. *Tetrahedron Lett* **2018**, *59*, 2647-2652, doi:10.1016/j.tetlet.2018.05.067.
53. Sun, Y.; Liu, W.C.; Shi, X.; Zheng, H.Z.; Zheng, Z.H.; Lu, X.H.; Xing, Y.; Ji, K.; Liu, M.; Dong, Y.S. Inducing secondary metabolite production of *Aspergillus sydowii* through microbial co-culture with *Bacillus subtilis*. *Microb. Cell. Fact.* **2021**, *20*, 42, doi:10.1186/s12934-021-01527-0.
54. Mercedes Cueto, P.R.J.e., Chris Kauffman, William Fenical, Emil Lobkovsky, Jon Clardy. Pestalone , a new antibiotic produced by a marine fungus in response to bacterial challenge. *J. Nat. Prod.* **2001**, *64*, 1444-1446.
55. Ola, A.R.B.; Thomy, D.; Lai, D.; Brötz-Oesterhelt, H.; Proksch, P. Inducing secondary metabolite production by the endophytic fungus *Fusarium tricinctum* through coculture with *Bacillus subtilis*. *J. Nat. Prod.* **2013**, *76*, 2094-2099, doi:10.1021/np400589h.
56. Robbins, N.; Spitzer, M.; Wang, W.; Waglechner, N.; Patel, D.J.; O'Brien, J.S.; Ejim, L.; Ejim, O.; Tyers, M.; Wright, G.D. Discovery of Ibomycin, a complex macrolactone that exerts antifungal activity by impeding endocytic trafficking and membrane function. *Cell Chem. Biol.* **2016**, *23*, 1383-1394, doi:10.1016/j.chembiol.2016.08.015.
57. Abdel-Wahab, N.M.; Scharf, S.; Ozkaya, F.C.; Kurtan, T.; Mandi, A.; Fouad, M.A.; Kamel, M.S.; Muller, W.E.G.; Kalscheuer, R.; Lin, W.; et al. Induction of secondary metabolites from the marine-derived fungus *Aspergillus versicolor* through co-cultivation with *Bacillus subtilis*. *Planta Med.* **2019**, *85*, 503-512, doi:10.1055/a-0835-2332.
58. Shi, L.-J.; Wu, Y.-M.; Yang, X.-Q.; Xu, T.-T.; Yang, S.; Wang, X.-Y.; Yang, Y.-B.; Ding, Z.-T. The cocultured *Nigrospora oryzae* and *Collectotrichum gloeosporioides*, *Irpex lacteus*, and the plant host *dendrobium officinale* bidirectionally regulate the production of phytotoxins by anti-phytopathogenic metabolites. *J. Nat. Prod.* **2020**, *83*, 1374-1382, doi:10.1021/acs.jnatprod.0c00036.
59. Hu, M.; Yang, X.Q.; Wang, C.F.; Zhao, T.D.; Wang, D.L.; Yang, Y.B.; Ding, Z.T. Paraverrucins A-F, antifeedant, and antiphytopathogenic polyketides from rhizospheric *paraphaeosphaeria verruculosa* and induced bioactivity enhancement by coculturing with host plant *Dendrobium officinale*. *ACS Omega.* **2020**, *5*, 30596-30602, doi:10.1021/acsomega.0c04548.
